# Supplementary material for: Discordance Between the Predicted Versus the Actually Recognized CD8+ T Cell Epitopes of HCMV pp65 Antigen and Aleatory Epitope Dominance
Source: PubMed Central journal article supplement (PMC7900545; doi:10.3389/fimmu.2020.618428), 2021-02-09
Supplement: DataSheet_1.pdf [file DataSheet_1.pdf]

| Ref.                 | Peptides Tested |                  |                          |           | Individual Subjects' CD8+ T Cell Response (SFU per 300,000 PBMC) |      |      |      |      |      |      |      |      |       |
|----------------------|-----------------|------------------|--------------------------|-----------|------------------------------------------------------------------|------|------|------|------|------|------|------|------|-------|
|                      | Peptide Name    | Epitope Sequence | Percentile Binding Score | pp65 Rank | ID 1                                                             | ID 2 | ID 3 | ID 4 | ID 5 | ID 6 | ID 7 | ID 8 | ID 9 | ID 10 |
| 45,46,47,48          | pp65:495-503    | NLVPMVATV        | 0.06                     | 1         | 60                                                               | 303  | 1    | 100  | 97   | 148  | 287  | 674  | 14   | 318   |
| 36                   | pp65:340-348    | RQYDPVAAL        | 0.06                     | 2         | 6                                                                | 7    | 5    | 6    | 0    | 2    | 1    | 2    | 5    | 21    |
| 33,40                | pp65:040-048    | RLLQTGIHV        | 0.09                     | 3         | 0                                                                | 1    | 2    | 7    | 3    | 0    | 5    | 13   | 2    | 1     |
| 33,39,40,41,42       | pp65:522-530    | RIFAELEGV        | 0.11                     | 5         | 5                                                                | 6    | 0    | 9    | 0    | 8    | 5    | 11   | 8    | 10    |
| 34,40                | pp65:320-328    | LMNGQQIFL        | 0.15                     | 4         | 14                                                               | 2    | 10   | 17   | 1    | 0    | 21   | 2    | 1    | 21    |
| 33                   | pp65:218-226    | VIGDQYVKV        | 0.23                     | 7         | 0                                                                | 0    | 10   | 3    | 2    | 1    | 6    | 5    | 17   | 1     |
| 34,35                | pp65:155-163    | QMWQARLTV        | 0.24                     | 6         | 1                                                                | 1    | 7    | 1    | 10   | 2    | 33   | 13   | 5    | 0     |
| 43,44                | pp65:014-022    | VLGPISGHV        | 0.24                     | 9         | 1                                                                | 1    | 10   | 3    | 5    | 0    | 3    | 24   | 8    | 8     |
| 33,37,41,43,44,49,50 | pp65:120-128    | MLNIPSINV        | 0.25                     | 11        | 8                                                                | 0    | 5    | 2    | 2    | 0    | 9    | 15   | 3    | 8     |
| 36                   | pp65:347-355    | ALFFFDIDL        | 0.54                     | 12        | 0                                                                | 0    | 8    | 23   | 0    | 0    | 3    | 14   | 1    | 3     |
| 40                   | pp65:491-499    | ILARNLVPM        | 0.74                     | 13        | 1                                                                | 0    | 5    | 2    | 1    | 2    | 7    | 2    | 7    | 3     |
| 33                   | pp65:425-433    | AMAGASTSA        | 0.85                     | 15        | 2                                                                | 0    | 5    | 2    | 1    | 1    | 8    | 7    | 1    | 2     |
| 37                   | pp65:042-050    | LQTGIHVRV        | 0.98                     | 21        | 1                                                                | 0    | 6    | 18   | 3    | 0    | 5    | 2    | 5    | 10    |
| 33                   | pp65:054-062    | SLILVSQYT        | 1.5                      | 23        | 1                                                                | 0    | 1    | 6    | 3    | 1    | 5    | 5    | 0    | 3     |
| 17                   | pp65:325-333    | QIFLEVQAI        | 1.6                      | 27        | 398                                                              | 1    | 6    | 16   | 5    | 1    | 1    | 13   | 0    | 7     |
| 33                   | pp65:312-320    | GLSIGNLL         | 1.9                      | 26        | 5                                                                | 0    | 9    | 5    | 0    | 2    | 5    | 6    | 5    | 2     |
| 33                   | pp65:110-118    | SIYVYALPL        | 2.2                      | 28        | 8                                                                | 0    | 5    | 9    | 0    | 0    | 1    | 18   | 3    | 13    |
| 33                   | pp65:227-235    | YLESFCEDV        | 2.6                      | 32        | 7                                                                | 0    | 1    | 2    | 1    | 2    | 22   | 7    | 5    | 2     |
| 37,38                | pp65:341-349    | QYDPVAALF        | 3.3                      | 36        | 1                                                                | 9    | 9    | 28   | 0    | 0    | 1    | 9    | 1    | 2     |
| 17                   | pp65:324-332    | QQIFLEVQA        | 4                        | 43        | 343                                                              | 0    | 5    | 3    | 3    | 0    | 6    | 5    | 1    | 8     |
| 33                   | pp65:519-527    | DIYRIFAEL        | 4.3                      | 49        | 1                                                                | 0    | 7    | 0    | 2    | 1    | 14   | 3    | 1    | 1     |
| 17                   | pp65:141-149    | HLPVADAVI        | 5.1                      | 54        | 7                                                                | 0    | 1    | 0    | 26   | 0    | 5    | 8    | 0    | 3     |
| 17                   | pp65:144-152    | VADAVIHAS        | 11                       | 80        | 1                                                                | 2    | 5    | 0    | 44   | 1    | 2    | 3    | 3    | 6     |
| 33                   | pp65:509-517    | KYQEFFWDA        | 12                       | 92        | 0                                                                | 2    | 2    | 2    | 0    | 3    | 11   | 2    | 2    | 7     |
| 36                   | pp65:345-353    | VAALFFFDI        | 16                       | 97        | 0                                                                | 6    | 2    | 23   | 0    | 0    | 8    | 3    | 2    | 5     |
| 17                   | pp65:203-211    | ELVCSMENT        | 23                       | 163       | 118                                                              | 0    | 0    | 2    | 1    | 1    | 21   | 3    | 7    | 1     |
| 17                   | pp65:221-229    | DQYVKVYLE        | 25                       | 229       | 1                                                                | 1    | 7    | 1    | 76   | 0    | 0    | 10   | 6    | 0     |
| 17                   | pp65:116-124    | LPLKMLNIP        | 51                       | 360       | 71                                                               | 0    | 7    | 14   | 2    | 3    | 5    | 18   | 5    | 2     |
| 17                   | pp65:417-425    | TPRVTTGGGA       | 63                       | 378       | 0                                                                | 0    | 3    | 32   | 0    | 1    | 10   | 2    | 558  | 2     |
| 17                   | pp65:418-426    | PRVTGGGAM        | 73                       | 394       | 1                                                                | 0    | 6    | 6    | 0    | 0    | 6    | 11   | 192  | 0     |
| 17                   | pp65:097-105    | PTGRSICPS        | 78                       | 510       | 0                                                                | 0    | 41   | 1    | 21   | 0    | 9    | 5    | 0    | 2     |
