# Supplementary material for: Discordance Between the Predicted Versus the Actually Recognized CD8+ T Cell Epitopes of HCMV pp65 Antigen and Aleatory Epitope Dominance
Source: Front Immunol. 2021 Feb 9;11:618428. doi: 10.3389/fimmu.2020.618428 (PMC7900545; doi:10.3389/fimmu.2020.618428)
Supplement: Supplementary file 6 [file Table_5.pdf]

| Peptides Tested                                                       |              | Individual Subjects' CD8+ T Cell Response (SFU per 300,000 PBMC) |      |      |      |      |      |      |      |      |       |
|-----------------------------------------------------------------------|--------------|------------------------------------------------------------------|------|------|------|------|------|------|------|------|-------|
| Sequence                                                              | Peptide Name | ID 1                                                             | ID 2 | ID 3 | ID 4 | ID 5 | ID 6 | ID 7 | ID 8 | ID 9 | ID 10 |
| pp65:011-019                                                          | MISVLGPIS    | 0                                                                | 2    | 0    | 1    | 2    | 0    | 51   | 24   | 1    | 2     |
| pp65:021-029                                                          | HVLKAVFSR    | 2                                                                | 0    | 1    | 1    | 1    | 2    | 46   | 6    | 3    | 1     |
| pp65:028-036                                                          | SRGDTPLVP    | 1                                                                | 0    | 1    | 3    | 1    | 2    | 2    | 20   | 0    | 18    |
| pp65:046-054                                                          | IHVVRVSQPS   | 6                                                                | 2    | 0    | 6    | 1    | 2    | 5    | 10   | 0    | 5     |
| pp65:053-061                                                          | PSLIILVSQY   | 1                                                                | 1    | 5    | 31   | 1    | 0    | 52   | 8    | 1    | 3     |
| pp65:066-074                                                          | TPCHRGDNQ    | 0                                                                | 0    | 6    | 31   | 1    | 1    | 2    | 3    | 1    | 9     |
| pp65:110-118                                                          | SIYVYALPL    | 8                                                                | 0    | 5    | 9    | 0    | 0    | 1    | 18   | 3    | 13    |
| pp65:117-125                                                          | PLKMLNIPS    | 7                                                                | 1    | 5    | 7    | 1    | 2    | 2    | 2    | 1    | 5     |
| pp65:120-128                                                          | MLNIPSINV    | 8                                                                | 0    | 5    | 2    | 2    | 0    | 9    | 15   | 3    | 8     |
| pp65:126-134                                                          | INVHHYPSA    | 0                                                                | 0    | 5    | 8    | 1    | 5    | 6    | 5    | 3    | 18    |
| pp65:134-142                                                          | AAERKHRHL    | 2                                                                | 0    | 3    | 3    | 0    | 0    | 7    | 10   | 1    | 18    |
| pp65:140-148                                                          | RHLPVADAV    | 6                                                                | 0    | 2    | 9    | 2    | 1    | 2    | 11   | 5    | 7     |
| pp65:162-170                                                          | TVSGLAWTR    | 7                                                                | 1    | 7    | 9    | 2    | 2    | 2    | 5    | 8    | 3     |
| pp65:174-182                                                          | QWKEPDVYY    | 10                                                               | 0    | 15   | 2    | 1    | 0    | 2    | 5    | 5    | 2     |
| pp65:193-201                                                          | VALRHVVCA    | 0                                                                | 1    | 11   | 0    | 0    | 0    | 62   | 3    | 2    | 0     |
| pp65:196-204                                                          | RHVVCAHEL    | 0                                                                | 0    | 23   | 0    | 1    | 0    | 21   | 7    | 7    | 1     |
| pp65:202-210                                                          | HELVCSMEN    | 0                                                                | 0    | 1    | 0    | 8    | 2    | 9    | 10   | 2    | 7     |
| pp65:209-217                                                          | ENRATKMQ     | 1                                                                | 0    | 5    | 0    | 7    | 5    | 2    | 3    | 5    | 3     |
| pp65:210-218                                                          | NTRATKMQV    | 1                                                                | 1    | 40   | 2    | 3    | 5    | 0    | 6    | 8    | 1     |
| pp65:264-272                                                          | MRPHERNGF    | 3                                                                | 0    | 2    | 6    | 8    | 0    | 9    | 3    | 1    | 2     |
| pp65:277-285                                                          | PKNMIKPG     | 2                                                                | 0    | 9    | 32   | 0    | 0    | 1    | 10   | 2    | 0     |
| pp65:285-293                                                          | GKISHIMLD    | 0                                                                | 0    | 8    | 40   | 0    | 2    | 0    | 6    | 0    | 0     |
| pp65:286-294                                                          | KISHIMLDV    | 1                                                                | 2    | 3    | 16   | 8    | 1    | 0    | 3    | 5    | 13    |
| pp65:289-297                                                          | HIMLDVAF     | 0                                                                | 2    | 3    | 26   | 1    | 0    | 3    | 10   | 3    | 0     |
| pp65:290-298                                                          | IMLDVAF      | 2                                                                | 9    | 2    | 14   | 5    | 1    | 3    | 6    | 5    | 9     |
| pp65:293-302                                                          | DVAF         | 1                                                                | 0    | 3    | 8    | 0    | 1    | 6    | 5    | 2    | 18    |
| pp65:301-309                                                          | HLGLCPKS     | 2                                                                | 0    | 1    | 18   | 0    | 0    | 7    | 1    | 0    | 20    |
| pp65:304-312                                                          | ILCPKSIPG    | 1                                                                | 0    | 6    | 8    | 1    | 5    | 3    | 8    | 2    | 21    |
| pp65:306-314                                                          | CPKSIPGLS    | 1                                                                | 1    | 5    | 15   | 1    | 1    | 10   | 7    | 1    | 18    |
| pp65:311-319                                                          | PGLSIGNL     | 1                                                                | 1    | 3    | 29   | 1    | 0    | 3    | 7    | 0    | 3     |
| pp65:316-324                                                          | SGNLLMNGQ    | 0                                                                | 6    | 8    | 2    | 1    | 2    | 2    | 9    | 3    | 29    |
| pp65:332-340                                                          | AIRETVELR    | 6                                                                | 0    | 3    | 7    | 1    | 0    | 5    | 5    | 7    | 17    |
| pp65:335-343                                                          | ETVELRQYD    | 0                                                                | 3    | 3    | 26   | 2    | 7    | 0    | 2    | 0    | 2     |
| pp65:337-345                                                          | VELRQYDPV    | 0                                                                | 0    | 14   | 31   | 0    | 0    | 2    | 7    | 11   | 3     |
| pp65:340-348                                                          | RQYDPVAAL    | 6                                                                | 7    | 5    | 6    | 0    | 2    | 1    | 2    | 5    | 21    |
| pp65:341-349                                                          | QYDPVAALF    | 1                                                                | 9    | 9    | 28   | 0    | 0    | 1    | 9    | 1    | 2     |
| pp65:346-354                                                          | AALFFFDID    | 0                                                                | 5    | 24   | 7    | 0    | 0    | 5    | 14   | 2    | 6     |
| pp65:351-359                                                          | FDIDLLLQR    | 1                                                                | 0    | 17   | 18   | 0    | 2    | 1    | 7    | 2    | 20    |
| pp65:356-364                                                          | LLQRGPQYS    | 7                                                                | 2    | 14   | 2    | 0    | 2    | 8    | 9    | 1    | 11    |
| pp65:363-371                                                          | YSEHPTFTS    | 2                                                                | 0    | 6    | 28   | 1    | 0    | 2    | 6    | 1    | 6     |
| pp65:365-373                                                          | EHPTFTSQY    | 0                                                                | 0    | 11   | 26   | 1    | 0    | 2    | 6    | 1    | 1     |
| pp65:368-374                                                          | TFTSQYRIQ    | 10                                                               | 1    | 26   | 8    | 0    | 7    | 9    | 14   | 13   | 15    |
| pp65:380-388                                                          | EYRHTWDRH    | 1                                                                | 2    | 9    | 28   | 0    | 1    | 9    | 3    | 5    | 9     |
| pp65:383-391                                                          | HTWDRHDEG    | 0                                                                | 0    | 25   | 13   | 1    | 0    | 16   | 3    | 2    | 2     |
| pp65:393-401                                                          | AQGDDDVWT    | 6                                                                | 0    | 1    | 1    | 0    | 2    | 9    | 5    | 1    | 2     |
| pp65:412-420                                                          | TTERKTPRV    | 2                                                                | 1    | 9    | 13   | 1    | 1    | 61   | 5    | 6    | 1     |
| pp65:432-440                                                          | SAGRKRKSA    | 1                                                                | 2    | 7    | 8    | 2    | 2    | 62   | 9    | 0    | 5     |
| pp65:460-468                                                          | STVAPEEDT    | 2                                                                | 8    | 6    | 29   | 9    | 0    | 30   | 20   | 10   | 6     |
| pp65:466-474                                                          | EDTDESDN     | 1                                                                | 0    | 5    | 29   | 0    | 7    | 2    | 5    | 3    | 10    |
| pp65:472-480                                                          | SDNEIHNP     | 0                                                                | 0    | 5    | 6    | 1    | 23   | 3    | 8    | 5    | 13    |
| pp65:477-485                                                          | HNPAVFTWP    | 0                                                                | 8    | 5    | 3    | 1    | 1    | 0    | 7    | 5    | 5     |
| pp65:486-494                                                          | PWQAGILAR    | 6                                                                | 11   | 9    | 5    | 3    | 1    | 6    | 9    | 2    | 17    |
| pp65:496-504                                                          | LVPMTATVQ    | 0                                                                | 5    | 15   | 15   | 0    | 5    | 14   | 1    | 10   | 18    |
| pp65:526-534                                                          | ELEGVWQPA    | 2                                                                | 7    | 2    | 23   | 1    | 16   | 3    | 6    | 1    | 1     |
| pp65:531-539                                                          | WQPAAQPKR    | 0                                                                | 8    | 2    | 10   | 0    | 3    | 10   | 1    | 5    | 1     |
| pp65:534-542                                                          | AAQPKRRRR    | 3                                                                | 1    | 0    | 6    | 2    | 1    | 7    | 3    | 24   | 6     |
| pp65:535-548                                                          | AQPKRRRRH    | 0                                                                | 10   | 2    | 3    | 1    | 1    | 10   | 3    | 3    | 5     |
| pp65:552-560                                                          | IATPKKHR     | 1                                                                | 9    | 2    | 18   | 0    | 1    | 14   | 6    | 14   | 3     |
| Negative Controls<br>and Cut Off Values<br>For Response<br>Categories | ̄            | 1.0                                                              | 0.8  | 4.2  | 3.9  | 3.9  | 1.8  | 6.5  | 8.4  | 5.4  | 3.2   |
|                                                                       | σ            | 1.0                                                              | 1.3  | 3.6  | 4.4  | 0.5  | 2.4  | 5.6  | 5.6  | 3.7  | 2.7   |
|                                                                       | ̄±3σ         | 3.9                                                              | 4.6  | 14.9 | 17.1 | 5.5  | 8.8  | 23.3 | 25.2 | 16.6 | 11.3  |
|                                                                       | ̄±5σ         | 5.8                                                              | 7.2  | 22.1 | 25.9 | 6.5  | 13.5 | 34.4 | 36.3 | 24.0 | 16.8  |
|                                                                       | ̄±10σ        | 10.7                                                             | 13.7 | 40.0 | 47.8 | 9.1  | 25.3 | 62.4 | 64.2 | 42.5 | 30.3  |
|                                                                       | >100 SFU     | >100                                                             | >100 | >100 | >100 | >100 | >100 | >100 | >100 | >100 | >100  |
