# Supplementary material for: Discordance Between the Predicted Versus the Actually Recognized CD8+ T Cell Epitopes of HCMV pp65 Antigen and Aleatory Epitope Dominance
Source: PubMed Central journal article supplement (PMC7900545; doi:10.3389/fimmu.2020.618428), 2021-02-09
Supplement: Table_2.pdf [file Table_2.pdf]

| Code  | Ethnicity          | Age | Gender | Blood Type | HLA A   | HLA B   | HLA C   |
|-------|--------------------|-----|--------|------------|---------|---------|---------|
| ID 1  | Hispanic/Latino    | 36  | Male   | O/Pos      | A*02:01 | B*40:08 | C*03:04 |
|       |                    |     |        |            | A*68:01 | B*44:03 | C*16:01 |
| ID 2  | Hispanic           | 30  | Male   | O/Pos      | A*02:01 | B*39:05 | C*02:02 |
|       |                    |     |        |            | A*24:02 | B*51:01 | C*07:02 |
| ID 3  | Hispanic           | 18  | Male   | A/Pos      | A*02:01 | B*07:02 | C*04:01 |
|       |                    |     |        |            | A*02:01 | B*35:17 | C*07:02 |
| ID 4  | Caucasian          | 25  | Male   | O/Pos      | A*02:01 | B*27:05 | C*01:02 |
|       |                    |     |        |            | A*23:01 | B*58:01 | C*07:01 |
| ID 5  | Hispanic           | 40  | Male   | O/Pos      | A*02:01 | B*39:05 | C*07:02 |
|       |                    |     |        |            | A*68:03 | B*51:01 | C*15:09 |
| ID 6  | Hispanic/Caucasian | 39  | Female | O/Pos      | A*02:01 | B*18:01 | C*01:02 |
|       |                    |     |        |            | A*25:01 | B*56:01 | C*12:03 |
| ID 7  | Hispanic           | 33  | Female | O/Pos      | A*02:01 | B*50:01 | C*05:01 |
|       |                    |     |        |            | A*23:01 | B*51:01 | C*07:01 |
| ID 8  | Caucasian          | 41  | Male   | O/Pos      | A*02:01 | B*13:02 | C*04:01 |
|       |                    |     |        |            | A*23:01 | B*44:03 | C*06:02 |
| ID 9  | Caucasian          | 71  | Male   | O/Pos      | A*02:01 | B*07:24 | C*07:01 |
|       |                    |     |        |            | A*03:01 | B*18:01 | C*07:02 |
| ID 10 | Caucasian          | 62  | Male   | B/Pos      | A*02:01 | B*41:02 | C*14:02 |
|       |                    |     |        |            | A*66:01 | B*51:01 | C*17:01 |
