# Supplementary material for: Discordance Between the Predicted Versus the Actually Recognized CD8+ T Cell Epitopes of HCMV pp65 Antigen and Aleatory Epitope Dominance
Source: PubMed Central journal article supplement (PMC7900545; doi:10.3389/fimmu.2020.618428), 2021-02-09
Supplement: Table_4.pdf [file Table_4.pdf]

| Peptides Tested                |            | Individual Subjects' CD8+ T Cell Response (SFU per 300,000 PBMC) |        |        |        |        |        |        |        |        |        |
|--------------------------------|------------|------------------------------------------------------------------|--------|--------|--------|--------|--------|--------|--------|--------|--------|
| Peptide Name                   | Sequence   | ID 1                                                             | ID 2   | ID 3   | ID 4   | ID 5   | ID 6   | ID 7   | ID 8   | ID 9   | ID 10  |
| pp65:018-026                   | ISGHVLKAV  | 0.00%                                                            | 0.00%  | 0.00%  | 0.00%  | 0.37%  | 0.00%  | 3.41%  | 0.00%  | 0.00%  | 0.00%  |
| pp65:030-038                   | GDPVLPHE   | 0.00%                                                            | 0.00%  | 0.00%  | 0.00%  | 0.00%  | 0.00%  | 0.00%  | 0.00%  | 0.00%  | 1.93%  |
| pp65:065-073                   | STPCHRGDN  | 1.02%                                                            | 0.00%  | 0.00%  | 4.20%  | 0.00%  | 0.00%  | 0.00%  | 0.00%  | 0.00%  | 0.00%  |
| pp65:070-078                   | RGDNQLQVQ  | 0.00%                                                            | 0.00%  | 0.00%  | 0.00%  | 0.00%  | 0.00%  | 4.24%  | 0.26%  | 0.00%  | 0.00%  |
| pp65:095-103                   | HNPTGRSIC  | 0.94%                                                            | 0.00%  | 0.23%  | 0.00%  | 0.00%  | 0.00%  | 0.00%  | 0.00%  | 0.00%  | 0.00%  |
| pp65:097-105                   | PTGRSICPS  | 0.00%                                                            | 0.00%  | 1.17%  | 0.00%  | 3.81%  | 0.00%  | 0.00%  | 0.00%  | 0.00%  | 0.00%  |
| pp65:103-121                   | CPSQEPMSI  | 0.94%                                                            | 0.00%  | 0.00%  | 0.00%  | 0.00%  | 0.00%  | 0.00%  | 0.00%  | 0.00%  | 0.00%  |
| pp65:106-114                   | QEPMSIYVY  | 0.86%                                                            | 0.00%  | 0.05%  | 0.00%  | 0.00%  | 0.00%  | 0.00%  | 0.00%  | 0.00%  | 0.00%  |
| pp65:107-108                   | EPMSIYVYA  | 0.00%                                                            | 0.00%  | 0.09%  | 0.00%  | 0.00%  | 0.00%  | 0.00%  | 34.16% | 0.00%  | 0.00%  |
| pp65:114-121                   | YALPLKMLN  | 1.53%                                                            | 0.00%  | 0.00%  | 0.00%  | 0.00%  | 0.00%  | 0.00%  | 0.00%  | 0.00%  | 0.00%  |
| pp65:115-123                   | ALPLKMLNI  | 0.77%                                                            | 0.00%  | 0.00%  | 0.00%  | 0.00%  | 0.00%  | 0.00%  | 0.00%  | 0.00%  | 0.00%  |
| pp65:116-124                   | LPLKMLNIP  | 5.68%                                                            | 0.00%  | 0.00%  | 0.00%  | 0.00%  | 0.00%  | 0.00%  | 0.00%  | 0.00%  | 0.00%  |
| pp65:119-127                   | KMLNIPISIN | 0.09%                                                            | 0.00%  | 0.00%  | 13.24% | 0.00%  | 0.00%  | 0.00%  | 0.00%  | 0.00%  | 0.00%  |
| pp65:139-148                   | HRHLPVADA  | 0.77%                                                            | 0.00%  | 0.00%  | 0.14%  | 0.00%  | 0.00%  | 0.00%  | 0.00%  | 0.00%  | 0.00%  |
| pp65:141-149                   | HLPVADAVI  | 0.26%                                                            | 0.00%  | 0.00%  | 0.00%  | 5.04%  | 0.00%  | 0.00%  | 0.00%  | 0.00%  | 0.00%  |
| pp65:142-150                   | LPVADAVIH  | 0.60%                                                            | 0.00%  | 0.00%  | 0.00%  | 0.00%  | 0.00%  | 0.00%  | 0.00%  | 0.00%  | 0.00%  |
| pp65:144-152                   | VADAVIHAS  | 0.00%                                                            | 0.00%  | 0.00%  | 0.00%  | 9.46%  | 0.00%  | 0.00%  | 0.00%  | 0.00%  | 0.00%  |
| pp65:149-157                   | IHASGQMW   | 0.00%                                                            | 0.00%  | 22.94% | 0.00%  | 0.00%  | 0.00%  | 0.00%  | 0.00%  | 0.00%  | 0.00%  |
| pp65:151-158                   | ASGQMWQA   | 1.36%                                                            | 0.00%  | 0.00%  | 0.00%  | 0.00%  | 0.00%  | 0.00%  | 0.00%  | 0.00%  | 0.00%  |
| pp65:152-160                   | SGQMWQAR   | 1.62%                                                            | 0.00%  | 0.00%  | 0.00%  | 0.00%  | 0.00%  | 0.00%  | 0.00%  | 0.00%  | 0.00%  |
| pp65:155-163                   | QMWARLTV   | 0.00%                                                            | 0.00%  | 0.00%  | 0.00%  | 1.11%  | 0.00%  | 0.68%  | 0.00%  | 0.00%  | 0.00%  |
| pp65:175-183                   | WKEPDVYYT  | 0.00%                                                            | 0.00%  | 0.00%  | 0.00%  | 34.03% | 0.00%  | 0.00%  | 0.00%  | 0.00%  | 0.00%  |
| pp65:188-196                   | FPTKDVLR   | 0.00%                                                            | 0.00%  | 0.00%  | 0.00%  | 0.12%  | 0.00%  | 46.94% | 0.00%  | 0.00%  | 0.00%  |
| pp65:203-211                   | ELVCSMENT  | 9.66%                                                            | 0.00%  | 0.00%  | 0.00%  | 0.00%  | 0.00%  | 0.00%  | 0.00%  | 0.00%  | 0.00%  |
| pp65:208-216                   | MENTRATKM  | 0.00%                                                            | 0.00%  | 2.52%  | 0.00%  | 0.00%  | 0.00%  | 0.00%  | 0.00%  | 0.00%  | 0.00%  |
| pp65:221-229                   | DQYVKVYLE  | 0.00%                                                            | 0.00%  | 0.00%  | 0.00%  | 17.32% | 0.00%  | 0.00%  | 0.00%  | 0.00%  | 0.00%  |
| pp65:228-236                   | LESFCDVMP  | 0.00%                                                            | 0.00%  | 0.00%  | 0.00%  | 1.11%  | 0.00%  | 0.00%  | 0.00%  | 0.00%  | 0.00%  |
| pp65:250-258                   | VEEDLTMT   | 0.00%                                                            | 0.00%  | 0.00%  | 0.00%  | 1.84%  | 0.00%  | 0.00%  | 0.00%  | 0.00%  | 0.00%  |
| pp65:251-259                   | EEDLTMTRN  | 0.00%                                                            | 0.00%  | 0.00%  | 0.00%  | 0.00%  | 0.00%  | 5.85%  | 0.00%  | 0.00%  | 0.00%  |
| pp65:262-270                   | PFMRPHERN  | 0.00%                                                            | 0.00%  | 6.57%  | 0.00%  | 0.00%  | 0.00%  | 0.00%  | 0.00%  | 0.00%  | 0.00%  |
| pp65:267-275                   | HERNGFTVL  | 0.00%                                                            | 0.00%  | 0.00%  | 0.00%  | 0.00%  | 0.00%  | 0.00%  | 0.00%  | 0.00%  | 3.23%  |
| pp65:270-278                   | NGFTVLCPK  | 0.00%                                                            | 0.00%  | 0.00%  | 0.00%  | 0.00%  | 0.00%  | 0.00%  | 0.00%  | 0.00%  | 27.84% |
| pp65:273-281                   | TVLCPKNMI  | 0.00%                                                            | 0.00%  | 0.00%  | 7.00%  | 0.00%  | 0.00%  | 0.00%  | 0.00%  | 0.00%  | 0.00%  |
| pp65:284-292                   | PGKISHIML  | 0.60%                                                            | 0.00%  | 0.00%  | 0.00%  | 0.00%  | 0.00%  | 0.00%  | 0.00%  | 0.00%  | 0.62%  |
| pp65:320-328                   | LMNGQQIFL  | 0.86%                                                            | 0.00%  | 0.00%  | 0.00%  | 0.00%  | 0.00%  | 0.00%  | 0.00%  | 0.00%  | 0.90%  |
| pp65:324-332                   | QQIFLEVQA  | 28.71%                                                           | 0.00%  | 0.00%  | 0.00%  | 0.00%  | 0.00%  | 0.00%  | 0.00%  | 0.00%  | 0.00%  |
| pp65:325-333                   | QIFLEVQAI  | 33.37%                                                           | 0.00%  | 0.00%  | 0.00%  | 0.00%  | 0.00%  | 0.00%  | 0.00%  | 0.00%  | 0.00%  |
| pp65:328-336                   | LEVQAIRET  | 0.00%                                                            | 0.09%  | 35.77% | 0.00%  | 0.00%  | 0.00%  | 0.00%  | 0.00%  | 0.00%  | 0.90%  |
| pp65:390-398                   | EGAAQGDDD  | 0.00%                                                            | 0.00%  | 0.00%  | 6.07%  | 0.00%  | 0.00%  | 0.00%  | 0.00%  | 0.00%  | 0.00%  |
| pp65:395-403                   | GDDDVWTSG  | 0.00%                                                            | 0.00%  | 0.00%  | 0.00%  | 0.00%  | 0.00%  | 6.59%  | 0.00%  | 0.00%  | 0.00%  |
| pp65:417-425                   | TPRVTGGGA  | 0.00%                                                            | 0.00%  | 0.00%  | 2.32%  | 0.00%  | 0.00%  | 0.00%  | 0.00%  | 73.07% | 0.00%  |
| pp65:418-426                   | PRVTGGGAM  | 0.00%                                                            | 0.00%  | 0.00%  | 0.00%  | 0.00%  | 0.00%  | 0.00%  | 0.00%  | 23.68% | 0.00%  |
| pp65:430-438                   | STSAGRKRK  | 0.00%                                                            | 0.00%  | 0.00%  | 11.22% | 0.00%  | 0.00%  | 0.75%  | 0.00%  | 0.00%  | 0.00%  |
| pp65:431-439                   | TSAGRKRKS  | 0.00%                                                            | 0.00%  | 0.00%  | 0.00%  | 0.00%  | 0.00%  | 4.80%  | 0.00%  | 0.00%  | 0.00%  |
| pp65:465-473                   | EEDTDESD   | 0.00%                                                            | 0.00%  | 0.00%  | 5.76%  | 0.00%  | 0.00%  | 0.00%  | 0.00%  | 0.00%  | 0.00%  |
| pp65:482-490                   | FTWPPWQAG  | 0.00%                                                            | 3.99%  | 0.00%  | 0.00%  | 0.00%  | 0.00%  | 0.00%  | 0.00%  | 0.00%  | 0.00%  |
| pp65:492-500                   | LARNLVPMV  | 1.45%                                                            | 0.00%  | 0.00%  | 0.00%  | 0.00%  | 0.00%  | 0.00%  | 0.00%  | 0.00%  | 0.00%  |
| pp65:495-503                   | NLVPMVATV  | 4.75%                                                            | 72.77% | 0.00%  | 12.93% | 22.48% | 87.00% | 18.43% | 58.67% | 0.00%  | 28.58% |
| pp65:503-511                   | VQGQNLKYQ  | 0.00%                                                            | 0.00%  | 22.36% | 0.00%  | 0.00%  | 0.00%  | 0.00%  | 0.00%  | 0.00%  | 0.00%  |
| pp65:511-519                   | QEFFWDAND  | 0.00%                                                            | 0.00%  | 0.00%  | 0.00%  | 0.00%  | 0.00%  | 0.00%  | 0.00%  | 0.00%  | 7.80%  |
| pp65:512-520                   | EFFWDANDI  | 0.00%                                                            | 5.70%  | 0.00%  | 0.00%  | 0.00%  | 0.00%  | 0.00%  | 0.00%  | 0.06%  | 4.63%  |
| pp65:513-521                   | FFWDANDIY  | 0.00%                                                            | 4.97%  | 0.00%  | 0.00%  | 0.00%  | 0.00%  | 0.00%  | 0.00%  | 0.00%  | 8.26%  |
| pp65:514-522                   | FWDANDIYR  | 0.00%                                                            | 0.00%  | 0.00%  | 0.00%  | 0.00%  | 0.00%  | 0.00%  | 0.00%  | 0.00%  | 3.04%  |
| pp65:521-529                   | YRIFAELEG  | 0.00%                                                            | 0.00%  | 2.93%  | 0.00%  | 0.00%  | 0.00%  | 0.33%  | 0.00%  | 0.00%  | 0.00%  |
| pp65:524-532                   | FAELEGVWQ  | 0.00%                                                            | 2.77%  | 0.00%  | 0.00%  | 0.00%  | 0.00%  | 0.05%  | 0.00%  | 0.00%  | 0.00%  |
| pp65:544-552                   | QDALPGPCI  | 0.00%                                                            | 0.34%  | 0.00%  | 0.00%  | 2.34%  | 0.00%  | 0.00%  | 0.00%  | 0.00%  | 0.00%  |
| Cumulative Specific SFU (100%) |            | 1185                                                             | 424    | 2226   | 683    | 418    | 161    | 1450   | 1111   | 746    | 1103   |
